# Supplementary material for: A wavelength-resolved ratiometric photoelectrochemical technique: design and sensing applications
Source: Royal Society of Chemistry journal article supplement (doi:10.1039/c5sc03336e), 2015-10-16
Supplement: c5sc03336e1.pdf [file c5sc03336e1.pdf]

1 Electronic Supplementary Information for

2 **Wavelength-resolved ratiometric photoelectrochemical**  
3 **technique: design and sensing applications**

4 Qing Hao,<sup>a</sup> Xiaonan Shan,<sup>b</sup> Jianping Lei,<sup>\*,a</sup> Yang Zang,<sup>a</sup> Qianhui Yang<sup>a</sup> and  
5 Huangxian Ju<sup>a</sup>

6 <sup>a</sup> State Key Laboratory of Analytical Chemistry for Life Science, School of Chemistry  
7 and Chemical Engineering, Nanjing University, Nanjing 210093, P.R. China

8 <sup>b</sup> Center for Bioelectronics and Biosensors, Biodesign Institute, Arizona State University,  
9 Tempe, Arizona 85287, United States

10 **Supporting Figures**

11 **Influence of Cu<sup>2+</sup> on MB loading amount**

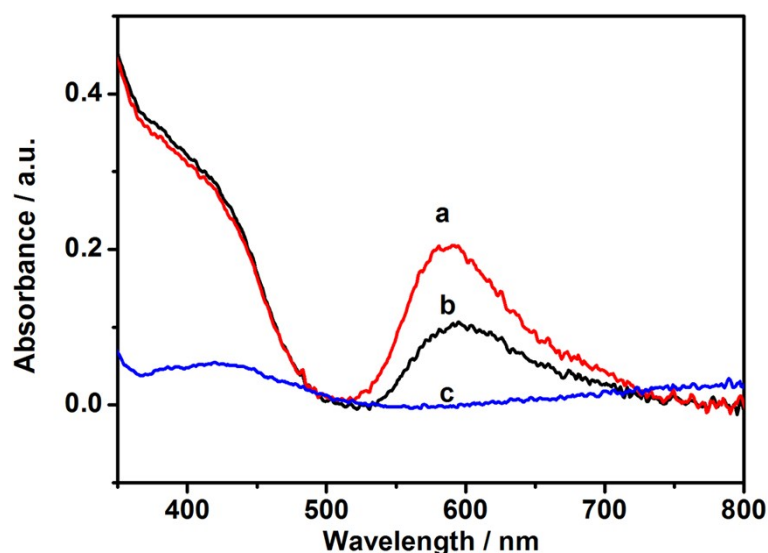

12

13 **Fig. S1** Absorption spectra of CdS modified ITO electrode incubation with Leuco-MB  
14 in the presence of 0.1 mM (a) and 40  $\mu$ M (b) Cu<sup>2+</sup>, and ITO electrode (c).

1 **Influence of illumination on photocurrent**

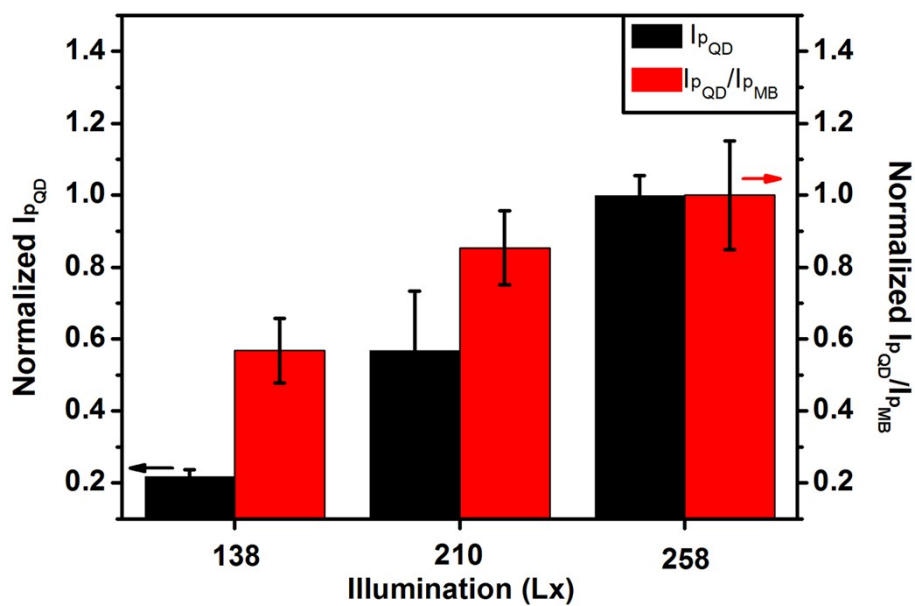

2

3 **Fig. S2** Normalized  $I_{p_{QD}}$  and  $I_{p_{QD}}/I_{p_{MB}}$  at 138 Lx, 210 Lx and 258 Lx illumination.

4 **Influence of CdS volume on photocurrent**

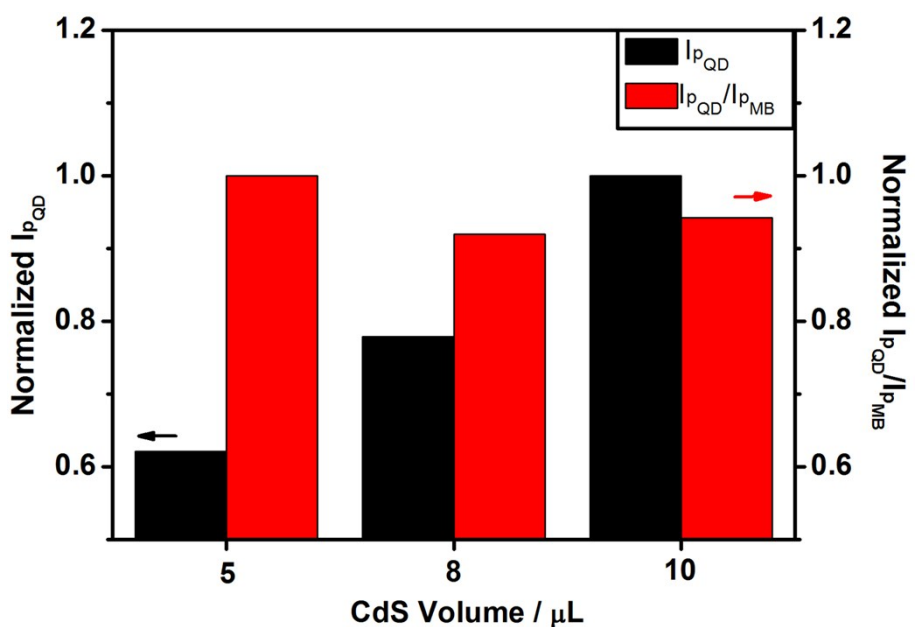

5

6 **Fig. S3** Normalized  $I_{p_{QD}}$  and  $I_{p_{QD}}/I_{p_{MB}}$  at the different CdS volume.

1 ***I*- $\lambda$  curve of CdS/MgPc AC-PEC photoelectrode**

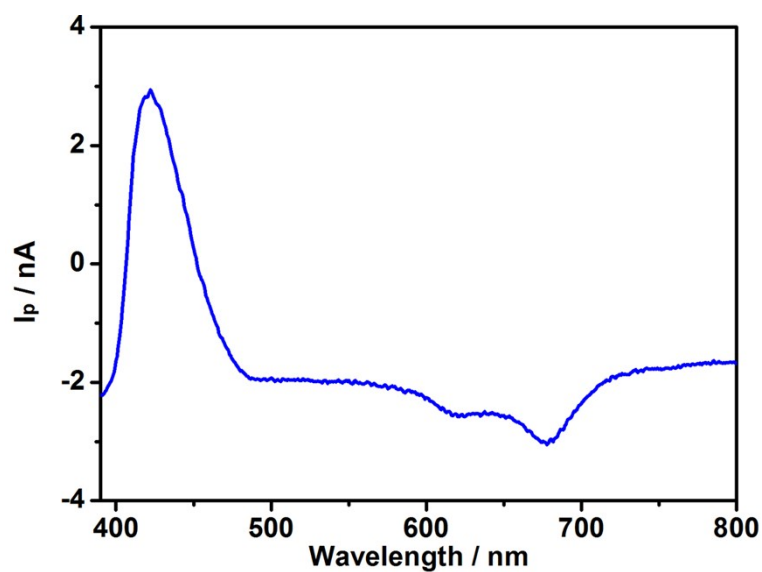

2

3 **Fig. S4** *I*- $\lambda$  curve of CdS/MgPc AC-PEC photoelectrode at 0 V in pH 5.0 PBS.

4 ***I*- $\lambda$  curve of CdTe/MgPc DC-PEC photoelectrode**

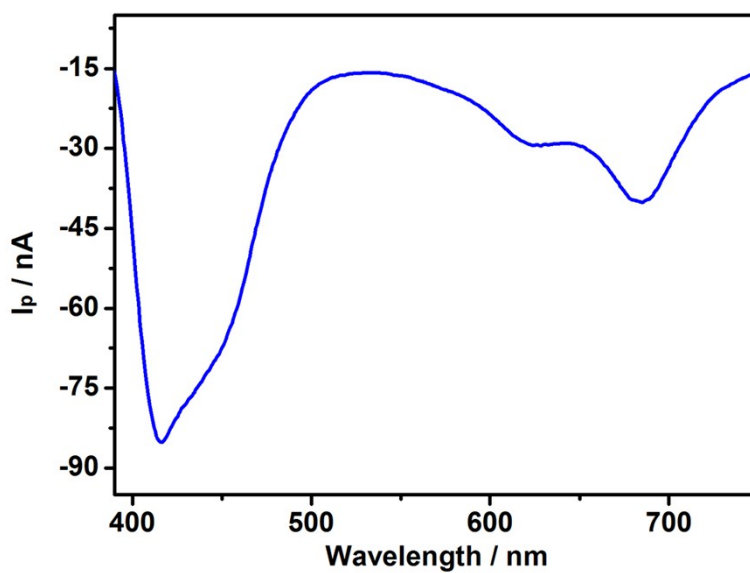

5

6 **Fig. S5** *I*- $\lambda$  curve of CdTe/MgPc DC-PEC photoelectrode at -0.2 V in pH 5.0 PBS.
